# Supplementary material for: Disease Burden of Meningitis Caused by Streptococcus pneumoniae Among Under-Fives in China: A Systematic Review and Meta-analysis
Source: Springer Nature journal article supplement (doi:10.1007/s40121-023-00878-y), 2023-10-14
Supplement: MOESM1 [file 26181058]

## Supplementary Materials

### Disease burden of meningitis caused by *Streptococcus pneumoniae* among under-fives in China: A systematic review and meta-analysis

Biyang Wang<sup>a,b</sup>, Wanjing Lin<sup>a,b</sup>, Chen Qian<sup>a,b</sup>, Youyi Zhang<sup>a,b</sup>, Genming Zhao<sup>a,b</sup>, Weibing Wang<sup>a,b,c\*</sup> and Tao Zhang<sup>a,b\*</sup>

<sup>a</sup>Department of Epidemiology, School of Public Health, Fudan University, Shanghai, 200032, China

<sup>b</sup>Key Laboratory of Public Health Safety, Ministry of Education, Shanghai, 200032, China

<sup>c</sup>Shanghai Institute of Infectious Disease and Biosecurity, Shanghai, 200032, China

**Running Title:** Pneumococcal meningitis of under-fives in China

#### Corresponding Author Information:

**Tao Zhang**, Department of Epidemiology, School of Public Health, Fudan University;  
Key Laboratory of Public Health Safety, Ministry of Education

E-mail: [tzhang@shmu.edu.cn](mailto:tzhang@shmu.edu.cn)

Address: 130 Dong'an Road, Xuhui District, Shanghai, 200032, P.R. China.

Tel: (+86) 13585834192

Or **Weibing Wang**, Shanghai Institute of Infectious Disease and Biosecurity;  
Department of Epidemiology, School of Public Health, Fudan University; Key  
Laboratory of Public Health Safety, Ministry of Education

E-mail: [wwb@fudan.edu.cn](mailto:wwb@fudan.edu.cn)

Address: 130 Dong'an Road, Xuhui District, Shanghai, 200032, P.R. China.

**Appendix S1.** Study selection and data adjustment

**Table S1.** PSRIMA 2020 checklist

**Table S2.** Included studies after full text screening

**Table S3.** Profile of included studies on incidence rate of meningitis

**Table S4.** Profile of included studies on mortality rate of meningitis

**Table S5.** Profile of included studies on case-fatality rate of meningitis

**Table S6.** Profile of included studies on etiology of bacterial meningitis

**Table S7.** Antimicrobial profile of *Streptococcus pneumoniae*

**Table S8.** Serotype distribution of detected *Streptococcus pneumoniae* in bacterial meningitis

**Table S9.** Sensitive analysis of estimated pneumococcal meningitis burden using different proxies for access to care

**Figure S1.** Flow chart of adjustments performed for estimates of pneumococcal meningitis burden

**Figure S2.** Distribution of included studies in each province

**Figure S3.** Distribution of case fatality rate of bacterial meningitis by time and age

**Figure S4.** Pooled proportion of different pathogens by age strata

**Figure S5.** Distribution of proportion of *Streptococcus pneumoniae* in detected pathogens by time and age

**Figure S6.** Forest plot of studies on incidence and mortality rate of meningitis

**Figure S7.** Forest plot of studies on case-fatality rate of meningitis.

**Figure S8.** Forest plot of studies on detection rate and proportion of *Streptococcus pneumoniae* among suspected bacterial meningitis cases

**Figure S9.** Forest plot of studies on *Streptococcus pneumoniae* positive rate in probable meningitis bacterial cases and proportion of pneumococcal meningitis in confirmed bacterial meningitis cases

## **Appendix S1. Study Selection and Data Adjustment**

### **Literature Search Strategy**

The literature search was restricted to articles published between January, 1980 and August, 2022. Studies on meningitis published between 1980 and 2021 will be identified using standard search algorithms for systematic review in order to estimate the overall incidence, mortality and case-fatality ratio of meningitis, the distribution of pathogens in meningitis, and the distribution of *Streptococcus pneumoniae* (*S. pneumoniae*) pathogenic serotypes.

### **Databases searched and detailed search criteria**

PubMed/Medline, Ovid-EMBASE, Biosis, Web of Science, Cochrane, and Chinese references databases (CNKI, Wanfang and ViP)

### **Inclusion and exclusion criteria**

Included articles should contain epidemiologic information on meningitis in children younger than five years in China with a surveillance period of 12 months or longer. Articles were excluded if no original data about incidence, prevalence, morbidity, or mortality of meningitis were provided. Narrative reviews, guidelines, or articles without accessible data were also excluded. In addition, articles focusing only on specific groups of patients (e.g., patients with human immunodeficiency virus) or reporting meningitis as one of the complications were ruled out for poor representativeness. We also excluded articles with only neonatal data because the etiological distribution was different from that for older children. Considering potential risk bias, we restricted case reports to those with no less than 50 cases. Studies focusing only on viral or fungal meningitis or providing no information on overall epidemiology of meningitis should be screened out. As our study aimed to assess disease burden of *S. pneumoniae*-induced meningitis, we ruled out studies reporting only data on a specific causal organism other than *S. pneumoniae*.

### **Quality assessment**

Validity of studies reporting on epidemiologic and etiologic characteristics of bacterial meningitis cases were independently assessed by two reviewers in terms of study design, reliability of diagnosis methods, and the possibility of leaving out potential cases. Based on these criteria, included studies were labeled as one of the three categories representing article quality: "A" papers which received approval from both reviewers that all criteria were met, "B" papers with only one approval, and "C" papers in which both reviewers judged that either criterion was not met or that data were not available to make a judgment. Prior to inclusion in the final dataset, a third quality assessment was performed on studies classified as "C" and all included studies. Studies remaining "C" quality after the third assessment were discarded.

PubMed

Access Date: 2022/08/10 21:30

Search Terms: "Meningitis" AND "China" AND "Child" AND ("Mortality" OR "Death" OR "Incidence" OR "Prevalence" OR "Morbidity" OR "Distribution")

Query: ("Meningitis"[Mesh] OR Meningitis[tw] OR Meningitides[tw] OR Pachymeningitis[tw] OR Pachymeningitides[tw]) AND ("China"[Mesh] OR China[tw] OR People's Republic of China[tw] OR Mainland China[tw] OR Sinkiang[tw] OR Inner Mongolia[tw] OR Manchuria[tw] OR Chinese[tw]) AND ("Child, Preschool"[Mesh] OR Preschool Child[tw] OR Children, Preschool[tw] OR Preschool

Children[tw] OR "Child"[Mesh] OR Child[tw] Children[tw] OR "Infant"[Mesh] Infant[tw] OR Infants[tw] OR "Infant, Newborn"[Mesh] OR Infants, Newborn[tw] OR Newborn Infant[tw] OR Newborn Infants[tw] OR Newborns[tw] OR Newborn[tw] OR Neonate[tw] OR Neonates[tw] OR pediatric[tw] OR underage[tw] OR baby[tw] OR babies[tw] OR neonate[tw] OR neonates [tw] OR toddler[tw] OR toddlers[tw] OR underage[tw] OR boy[tw] OR boys[tw] OR girl[tw] OR girls[tw] OR kid[tw] OR kids[tw] OR minor[tw] OR minors[tw]) AND (("Mortality"[Mesh] OR Mortality[tw] OR Mortalities[tw] OR Case Fatality Rate[tw] OR Case Fatality Rates[tw] OR Rate, Case Fatality[tw] OR Rates, Case Fatality[tw] OR CFR Case Fatality Rate[tw] OR Case Fatality Ratio[tw] OR Case Fatality Ratios[tw] OR Crude Death Rate[tw] OR Crude Death Rates[tw] OR Death Rate, Crude[tw] OR Rate, Crude Death[tw] OR Crude Mortality Rate[tw] OR Crude Mortality Rates[tw] OR Mortality Rate, Crude[tw] OR Rate, Crude Mortality[tw] OR Death Rate[tw] OR Death Rates[tw] OR Rate, Death[tw] OR Mortality Rate[tw] OR Mortality Rates[tw] OR Rate, Mortality[tw] OR Mortality, Excess[tw] OR Excess Mortality[tw] OR Excess Mortalities[tw] OR Decline, Mortality[tw] OR Mortality Declines[tw] OR Mortality Decline[tw] OR Mortality Determinants[tw] OR Determinants, Mortality[tw] OR Determinant, Mortality[tw] OR Mortality Determinant[tw] OR Mortality, Differential[tw] OR Differential Mortality[tw] OR Differential Mortalities[tw] OR Age-Specific Death Rate[tw] OR Age-Specific Death Rates[tw] OR Death Rate, Age-Specific[tw] OR Rate, Age-Specific Death[tw] OR Age Specific Death Rate[tw] OR "Death"[Mesh] OR Death[tw]) OR ("Incidence"[Mesh] OR Incidence[tw] OR Incidences[tw] OR Secondary Attack Rate[tw] OR Attack Rate, Secondary[tw] OR Rate, Secondary Attack[tw] OR Secondary Attack Rates[tw] OR Incidence Proportion[tw] OR Incidence Proportions[tw] OR Proportion, Incidence[tw] OR Attack Rate[tw] OR Attack Rates[tw] OR Rate, Attack[tw] OR Cumulative Incidence[tw] OR Cumulative Incidences[tw] OR Incidence, Cumulative[tw] OR Incidence Rate[tw] OR Incidence Rates[tw] OR Rate, Incidence[tw] OR Person-time Rate[tw] OR Person time Rate[tw] OR Person-time Rates[tw] OR Rate, Person-time[tw]) OR ("Prevalence"[Mesh] OR Prevalence[tw] OR Prevalences[tw] OR Period Prevalence[tw] OR Period Prevalences[tw] OR Prevalence, Period[tw] OR Point Prevalence[tw] OR Point Prevalences[tw] OR Prevalence, Point[tw] OR "Morbidity"[Mesh] OR Morbidity[tw] OR Distribution[tw] OR Etiology[tw] OR Epidemic[tw])

Filter: Publication date from 1980/01/01 to 2022/08/09.

Result: 203

Ovid-EMBASE

Access Date:

Step 1: exp meningitis/ OR meningitis.tw.

Step 2: exp China/ OR China.tw. OR exp Chinese/ OR Chinese.tw.

Step 3: 1 AND 2

Step 4: exp child/ or exp childhood disease/ or exp infant disease/ or (babies or baby or boy? or boyfriend or boyhood or girlfriend or girlhood or child\* or girl? or infan\* or kid? or minors or minors\* or neonat\* or neo-nat\* or neo-nat\* or newborn\* or new-born\* or paediatric\* or peadiatric\* or pediatric\* or perinat\* or preschool\* or toddler? or underage? or under-age?).tw.

Step 5: 3 AND 4

Step 6:

Step 6: limit 3 to (infant <to one year> or child <unspecified age> or preschool child <1 to 6 years>)

Step 7: 5 OR 6

Step 8: exp mortality/ or exp incidence/ or exp prevalence/ or exp mortality rate/ or exp incidence rate/

or exp prevalence rate/ or exp etiology/ or exp epidemic/ or (mortality or mortalities or "case fatality rate" or "case fatality rates" or CFR or "case fatality ratio" or "case fatality ratios" or "crude death rate" or "death rate" or "crude mortality rate" or "mortality rate" or "crude death rates" or "death rates" or "crude mortality rates" or "mortality rates" or "excess mortality" or "excess mortalities" or "decline" or "mortality determinant" or "declines" or "mortality determinants" or "differential mortality" or "differential mortalities" or "age-specific death rate" or "age-specific death rates") or (incidence? or "secondary attack rate" or "incidence proportion" or "attack rate" or "cumulative incidence" or "incidence rate" or "person-time rate" or "secondary attack rates" or "incidence proportions" or "attack rates" or "cumulative incidences" or "incidence rates" or "person-time rates") or (prevalence? or "period prevalence" or "point prevalence" or "period prevalences" or "point prevalences" or morbidity or distribution)).tw.

Step 9: 7 AND 8

Step 10: limit 9 to yr="1980-Current"

Result: 386

Web of Science

Step 1: TS=(meningitis)

Step 2: ALL=(China OR Chinese)

Step 3: ALL=(babies or baby or boy? or boyfriend or boyhood or girlfriend or girlhood or child? or girl? or infan\* or kid? or minors or minors\* or neonat\* or neo-nat\* or neo-nat\* or newborn\* or new-bom\* or paediatric\* or peadiatric\* or pediatric\* or perinat\* or preschool\* or toddler? or underage? or under-age?)

Step 4: ALL=((mortality or mortalities or "case fatality rate" or "case fatality rates" or CFR or "case fatality ratio" or "case fatality ratios" or "crude death rate" or "death rate" or "crude mortality rate" or "mortality rate" or "crude death rates" or "death rates" or "crude mortality rates" or "mortality rates" or "excess mortality" or "excess mortalities" or "decline" or "mortality determinant" or "declines" or "mortality determinants" or "differential mortality" or "differential mortalities" or "age-specific death rate" or "age-specific death rates") or (incidence? or "secondary attack rate" or "incidence proportion" or "attack rate" or "cumulative incidence" or "incidence rate" or "person-time rate" or "secondary attack rates" or "incidence proportions" or "attack rates" or "cumulative incidences" or "incidence rates" or "person-time rates") or (prevalence? or "period prevalence" or "point prevalence" or "period prevalences" or "point prevalences" or morbidity or distribution or etiology or epidemic))

Step 5: #1 AND #2 AND #3 AND #4

Filters: Publication date from 1980/01/01 to 2022/08/09.

Result: 193

BIOSIS Previews

Step 1: TS=(meningitis)

Step 2: TS=(China OR Chinese)

Step 3: TS=(babies or baby or boy? or boyfriend or boyhood or girlfriend or girlhood or child? or girl? or infan\* or kid? or minors or minors\* or neonat\* or neo-nat\* or neo-nat\* or newborn\* or new-bom\* or paediatric\* or peadiatric\* or pediatric\* or perinat\* or preschool\* or toddler? or underage? or under-age?)

Step 4: #1 AND #2 AND #3

Step 4: TS=((mortality or mortalities or "case fatality rate" or "case fatality rates" or CFR or "case fatality ratio" or "case fatality ratios" or "crude death rate" or "death rate" or "crude mortality rate" or "mortality

rate" or "crude death rates" or "death rates" or "crude mortality rates" or "mortality rates" or "excess mortality" or "excess mortalities" or "decline" or "mortality determinant" or "declines" or "mortality determinants" or "differential mortality" or "differential mortalities" or "age-specific death rate" or "age-specific death rates") or (incidence? or "secondary attack rate" or "incidence proportion" or "attack rate" or "cumulative incidence" or "incidence rate" or "person-time rate" or "secondary attack rates" or "incidence proportions" or "attack rates" or "cumulative incidences" or "incidence rates" or "person-time rates") or (prevalence? or "period prevalence" or "point prevalence" or "period prevalences" or "point prevalences" or morbidity or distribution or etiology or epidemic))

Step 5: #1 AND #2 AND #3 AND #4

Filter: Publication date from 1980/01/01 to 2022/08/09.

Result: 122

Cochrane

Step 1: MeSH descriptor: [meningitis] explode all trees

Step 2: (meningitis):ti,ab,kw

Step 3: #1 OR #2

Step 4: (China OR Chinese):ti,ab,kw

Step 5: (babies or baby or boy? or boyfriend or boyhood or girlfriend or girlhood or child? or girl? or infan\* or kid? or minors or minors\* or neonat\* or neo-nat\* or neo-nat\* or newborn\* or new-bom\* or paediatric\* or peadiatric\* or pediatric\* or perinat\* or preschool\* or toddler? or underage? or under-age?):ti,ab,kw

Step 6: ((mortality or mortalities or "case fatality rate" or "case fatality rates" or CFR or "case fatality ratio" or "case fatality ratios" or "crude death rate" or "death rate" or "crude mortality rate" or "mortality rate" or "crude death rates" or "death rates" or "crude mortality rates" or "mortality rates" or "excess mortality" or "excess mortalities" or "decline" or "mortality determinant" or "declines" or "mortality determinants" or "differential mortality" or "differential mortalities" or "age-specific death rate" or "age-specific death rates") or (incidence? or "secondary attack rate" or "incidence proportion" or "attack rate" or "cumulative incidence" or "incidence rate" or "person-time rate" or "secondary attack rates" or "incidence proportions" or "attack rates" or "cumulative incidences" or "incidence rates" or "person-time rates") or (prevalence? or "period prevalence" or "point prevalence" or "period prevalences" or "point prevalences" or morbidity or distribution or etiology or epidemic)):ti,ab,kw

Step 7: #3 AND #4 AND #5 AND #6

Result: 11

CNKI

(SU=(xinshenger'+ying'er'+yingyouer'+youer'+xiaoer'+ertong') OR AB=(xinshenger'+ying'er'+yingyouer'+youer'+xiaoer'+ertong') OR TI=(xinshenger'+ying'er'+yingyouer'+youer'+xiaoer'+ertong') OR KY=(xinshenger'+ying'er'+yingyouer'+youer'+xiaoer'+ertong')) AND (SU=naomoyan' OR A B=naomoyan' OR TI=naomoyan' OR KY=naomoyan') AND (SU=(siwang'+huanbing'+bing'si'+fabing'+lihuan'+fenbu'+bingyin'+liuxing'+zhisilv'+bingli') OR AB=(siwang'+huanbing'+bing'si'+fabing'+lihuan'+fenbu'+bingyin'+liuxing'+zhisilv'+bingli') OR TI=(siwang'+huanbing'+bing'si'+fabing'+lihuan'+fenbu'+bingyin'+liuxing'+zhisilv'+bingli') OR KY=(siwang'+huanbing'+bing'si'+fabing'+lihuan'+fenbu'+bingyin'+liuxing'+zhisilv'+bingli'))

(SU=(新生儿'+婴儿'+婴幼儿'+幼儿'+小儿'+儿童') OR AB=(新生儿'+婴儿'+婴幼儿'+幼儿'+小

儿+儿童')OR TI=('新生儿'+婴儿'+婴幼儿'+幼儿'+小儿'+儿童')OR KY=('新生儿'+婴儿'+婴幼儿'+幼儿'+小儿'+儿童'))AND (SU='脑膜炎'OR AB='脑膜炎'OR TI='脑膜炎'OR KY='脑膜炎')AND (SU=('死亡'+患病'+病死'+发病'+罹患'+分布'+病因'+流行'+致死率'+病例')OR AB=('死亡'+患病'+病死'+发病'+罹患'+分布'+病因'+流行'+致死率'+病例')OR TI=('死亡'+患病'+病死'+发病'+罹患'+分布'+病因'+流行'+致死率'+病例')OR KY=('死亡'+患病'+病死'+发病'+罹患'+分布'+病因'+流行'+致死率'+病例'))

Filters: Publication date from 1980/01/01 to 2022/08/09.

Result: 4473

#### Wanfang

((subject:(xinshenger) or subject:(yinger) or subject:(yingyouer) or subject:(youer) or subject:(xiaoer) or subject:(ertong)) and subject:(naomoyan)) and (subject:(siwang) or subject:(huanbing) or subject:(fabing) or subject:(lihuan) or subject:(fenbu) or subject:(bingyin) or subject:(liuxing) or subject:(zhisilv) or subject:(bingli))) and Date:1980-\*

((主题:(新生儿) or 主题:(婴儿) or 主题:(婴幼儿) or 主题:(幼儿) or 主题:(小儿) or 主题:(儿童)) and 主题:(脑膜炎) and (主题:(死亡) or 主题:(患病) or 主题:(发病) or 主题:(罹患) or 主题:(分布) or 主题:(病因) or 主题:(流行) or 主题:(致死率) or 主题:(病例))) and Date:1980-\* Result: 4413

#### VIP

(M=(xinshenger+yinger+yingyouer+youer+xiaoer+ertong)+R=(xinshenger+yinger+yingyouer+youer+xiaoer+ertong))\* (M=naomoyan+R=naomoyan)\* (M=(siwang+huanbing+bingyin+fabing+lihuan+fenbu+bingyin+liuxing+zhisilv+bingli)+R=(siwang+huanbing+bingyin+fabing+lihuan+fenbu+bingyin+liuxing+zhisilv+bingli))

(M=(新生儿+ 婴儿+婴幼儿+幼儿+小儿+儿童)+R=(新生儿+ 婴儿+婴幼儿+幼儿+小儿+儿童))\* (M=脑膜炎+R=脑膜炎)\* (M=(死亡+患病+病死+发病+罹患+分布+病因+流行+致死率+病例)+R=(死亡+患病+病死+发病+罹患+分布+病因+流行+致死率+病例))

Result: 3281

#### Data adjustment

Adjustments for hospitalization proportion, PCV use and access to care were considered. Proportion of in-hospital cases derived from patients with acute meningitis or encephalitis (AME) was applied to calculate incidence rate. Since the hospitalization rate study was conducted after introduction of PCV7, we then adjusted it to generate non-PCV incidence rate for meta-analysis. When estimating pneumococcal meningitis deaths, pooled raw CFR from meta-analysis was adjusted with potential access to care because children with pneumococcal meningitis might die at home, and some might be misdiagnosed on admission. We utilized the proportion of children seeking care for minor illnesses (such as stomachache or diarrhea) from CHNS as a proxy.

**Table S1. PSRIMA 2020 checklist**

| Section and Topic             | Item # | Checklist item                                                                                                                                                                                                                                                                                       | Location where item is reported |
|-------------------------------|--------|------------------------------------------------------------------------------------------------------------------------------------------------------------------------------------------------------------------------------------------------------------------------------------------------------|---------------------------------|
| <b>TITLE</b>                  |        |                                                                                                                                                                                                                                                                                                      |                                 |
| Title                         | 1      | Identify the report as a systematic review.                                                                                                                                                                                                                                                          | 1                               |
| <b>ABSTRACT</b>               |        |                                                                                                                                                                                                                                                                                                      |                                 |
| Abstract                      | 2      | See the PRISMA 2020 for Abstracts checklist.                                                                                                                                                                                                                                                         | 2                               |
| <b>INTRODUCTION</b>           |        |                                                                                                                                                                                                                                                                                                      |                                 |
| Rationale                     | 3      | Describe the rationale for the review in the context of existing knowledge.                                                                                                                                                                                                                          | 4-5                             |
| Objectives                    | 4      | Provide an explicit statement of the objective(s) or question(s) the review addresses.                                                                                                                                                                                                               | 4-5                             |
| <b>METHODS</b>                |        |                                                                                                                                                                                                                                                                                                      |                                 |
| Eligibility criteria          | 5      | Specify the inclusion and exclusion criteria for the review and how studies were grouped for the syntheses.                                                                                                                                                                                          | 5-6                             |
| Information sources           | 6      | Specify all databases, registers, websites, organisations, reference lists and other sources searched or consulted to identify studies. Specify the date when each source was last searched or consulted.                                                                                            | 5 & Appendix S1                 |
| Search strategy               | 7      | Present the full search strategies for all databases, registers and websites, including any filters and limits used.                                                                                                                                                                                 | Appendix S1                     |
| Selection process             | 8      | Specify the methods used to decide whether a study met the inclusion criteria of the review, including how many reviewers screened each record and each report retrieved, whether they worked independently, and if applicable, details of automation tools used in the process.                     | 6                               |
| Data collection process       | 9      | Specify the methods used to collect data from reports, including how many reviewers collected data from each report, whether they worked independently, any processes for obtaining or confirming data from study investigators, and if applicable, details of automation tools used in the process. | 6                               |
| Data items                    | 10a    | List and define all outcomes for which data were sought. Specify whether all results that were compatible with each outcome domain in each study were sought (e.g. for all measures, time points, analyses), and if not, the methods used to decide which results to collect.                        | 7                               |
|                               | 10b    | List and define all other variables for which data were sought (e.g. participant and intervention characteristics, funding sources). Describe any assumptions made about any missing or unclear information.                                                                                         | 7                               |
| Study risk of bias assessment | 11     | Specify the methods used to assess risk of bias in the included studies, including details of the tool(s) used, how many reviewers assessed each study and whether they worked independently, and if applicable, details of automation tools used in the process.                                    | None                            |
| Effect                        | 12     | Specify for each outcome the effect measure(s) (e.g. risk ratio, mean difference) used                                                                                                                                                                                                               | 7                               |



|                               |     |                                                                                                                                                                                                                                                                                      |              |
|-------------------------------|-----|--------------------------------------------------------------------------------------------------------------------------------------------------------------------------------------------------------------------------------------------------------------------------------------|--------------|
| measures                      |     | in the synthesis or presentation of results.                                                                                                                                                                                                                                         |              |
| Synthesis methods             | 13a | Describe the processes used to decide which studies were eligible for each synthesis (e.g. tabulating the study intervention characteristics and comparing against the planned groups for each synthesis (item #5)).                                                                 | 7-8          |
|                               | 13b | Describe any methods required to prepare the data for presentation or synthesis, such as handling of missing summary statistics, or data conversions.                                                                                                                                | 7-8          |
|                               | 13c | Describe any methods used to tabulate or visually display results of individual studies and syntheses.                                                                                                                                                                               | 7-8          |
|                               | 13d | Describe any methods used to synthesize results and provide a rationale for the choice(s). If meta-analysis was performed, describe the model(s), method(s) to identify the presence and extent of statistical heterogeneity, and software package(s) used.                          | 7-8          |
|                               | 13e | Describe any methods used to explore possible causes of heterogeneity among study results (e.g. subgroup analysis, meta-regression).                                                                                                                                                 | 7-8          |
|                               | 13f | Describe any sensitivity analyses conducted to assess robustness of the synthesized results.                                                                                                                                                                                         | 8 & Table S7 |
| Reporting bias assessment     | 14  | Describe any methods used to assess risk of bias due to missing results in a synthesis (arising from reporting biases).                                                                                                                                                              | None         |
| Certainty assessment          | 15  | Describe any methods used to assess certainty (or confidence) in the body of evidence for an outcome.                                                                                                                                                                                | 7            |
| <b>RESULTS</b>                |     |                                                                                                                                                                                                                                                                                      |              |
| Study selection               | 16a | Describe the results of the search and selection process, from the number of records identified in the search to the number of studies included in the review, ideally using a flow diagram.                                                                                         | 8-9          |
|                               | 16b | Cite studies that might appear to meet the inclusion criteria, but which were excluded, and explain why they were excluded.                                                                                                                                                          | 8-9          |
| Study characteristics         | 17  | Cite each included study and present its characteristics.                                                                                                                                                                                                                            | Table S2-S6  |
| Risk of bias in studies       | 18  | Present assessments of risk of bias for each included study.                                                                                                                                                                                                                         | None         |
| Results of individual studies | 19  | For all outcomes, present, for each study: (a) summary statistics for each group (where appropriate) and (b) an effect estimate and its precision (e.g. confidence/credible interval), ideally using structured tables or plots.                                                     | 9-12         |
| Results of syntheses          | 20a | For each synthesis, briefly summarise the characteristics and risk of bias among contributing studies.                                                                                                                                                                               | 9-12         |
|                               | 20b | Present results of all statistical syntheses conducted. If meta-analysis was done, present for each the summary estimate and its precision (e.g. confidence/credible interval) and measures of statistical heterogeneity. If comparing groups, describe the direction of the effect. | 9-12         |

|                                                |     |                                                                                                                                                                                                                                            |          |
|------------------------------------------------|-----|--------------------------------------------------------------------------------------------------------------------------------------------------------------------------------------------------------------------------------------------|----------|
|                                                | 20c | Present results of all investigations of possible causes of heterogeneity among study results.                                                                                                                                             | 9-12     |
|                                                | 20d | Present results of all sensitivity analyses conducted to assess the robustness of the synthesized results.                                                                                                                                 | Table S9 |
| Reporting biases                               | 21  | Present assessments of risk of bias due to missing results (arising from reporting biases) for each synthesis assessed.                                                                                                                    | None     |
| Certainty of evidence                          | 22  | Present assessments of certainty (or confidence) in the body of evidence for each outcome assessed.                                                                                                                                        | 9-12     |
| <b>DISCUSSION</b>                              |     |                                                                                                                                                                                                                                            |          |
| Discussion                                     | 23a | Provide a general interpretation of the results in the context of other evidence.                                                                                                                                                          | 13       |
|                                                | 23b | Discuss any limitations of the evidence included in the review.                                                                                                                                                                            | 14&17    |
|                                                | 23c | Discuss any limitations of the review processes used.                                                                                                                                                                                      | 16-17    |
|                                                | 23d | Discuss implications of the results for practice, policy, and future research.                                                                                                                                                             | 16-17    |
| <b>OTHER INFORMATION</b>                       |     |                                                                                                                                                                                                                                            |          |
| Registration and protocol                      | 24a | Provide registration information for the review, including register name and registration number, or state that the review was not registered.                                                                                             | None     |
|                                                | 24b | Indicate where the review protocol can be accessed, or state that a protocol was not prepared.                                                                                                                                             | None     |
|                                                | 24c | Describe and explain any amendments to information provided at registration or in the protocol.                                                                                                                                            | None     |
| Support                                        | 25  | Describe sources of financial or non-financial support for the review, and the role of the funders or sponsors in the review.                                                                                                              | 1&18     |
| Competing interests                            | 26  | Declare any competing interests of review authors.                                                                                                                                                                                         | 18       |
| Availability of data, code and other materials | 27  | Report which of the following are publicly available and where they can be found: template data collection forms; data extracted from included studies; data used for all analyses; analytic code; any other materials used in the review. | None     |

**Table S2. Included studies after full text screening**

---

| <b>Studies reporting on epidemiology of meningitis</b>                                                                                                                                                                                                                                                                              |
|-------------------------------------------------------------------------------------------------------------------------------------------------------------------------------------------------------------------------------------------------------------------------------------------------------------------------------------|
| 1. Wu X, Dong BQ, Lin M, et al. Analysis of epidemiologic features of children with suspected meningitis in Nanning, Guangxi, 2000-2002. <i>Guangxi Prev Med</i> 2004; <b>10</b> (6): 324–6 (in Chinese).                                                                                                                           |
| 2. Yang J, Dong B, Lin M, et al. Surveillance of acute encephalitis and meningitis in Guangxi autonomous region, China. <i>Dis Surveill</i> 2010; <b>25</b> (03): 190–4 (in Chinese).                                                                                                                                               |
| 3. Yang Y, Leng Z, Shen X, et al. Acute bacterial meningitis in children in Hefei, China 1990-1992. <i>Chin Med J (Engl)</i> 1996; <b>109</b> (5): 385–8.                                                                                                                                                                           |
| 4. Huang S. Clinical analysis of 108 cases purulent meningitis in infants [Master's Thesis]: Guangxi Medical University; 2013 (in Chinese).                                                                                                                                                                                         |
| 5. Li Y, Yin Z, Shao Z, et al. Population-based surveillance for bacterial meningitis in China, September 2006-December 2009. <i>Emerg Infect Dis</i> 2014; <b>20</b> (1): 61-9.                                                                                                                                                    |
| 6. Huang M. The etiology and clinical analysis of purulent meningitis in children [Master's Thesis]: Chongqing Medical University; 2016 (in Chinese).                                                                                                                                                                               |
| 7. Huo L, Jiang C, Fan Y, Gao J, Wang H. Clinical features of hydrocephalus in 2067 cases of childhood purulent meningitis. <i>Chin J Pract Pediatr</i> 2018; <b>33</b> (7): 532–7 (in Chinese).                                                                                                                                    |
| 8. LIR, Wu S, Li L, Zhu L, Cui X. Analysis of distribution and drug resistance of pathogenic bacteria of meningitis infection in children. <i>Chinese Journal of Laboratory Pathologist</i> 2010; <b>2</b> (4): 205–8 (in Chinese).                                                                                                 |
| 9. Zhang L. The clinical manifestation and prognosis factor of purulent meningitis in 216 children [Master's Thesis]: Xuzhou Medical University; 2008 (in Chinese).                                                                                                                                                                 |
| 10. Dong B, Tang Z, Lin M, et al. Epidemiologic surveillance for bacterial meningitis in 140 000 children under 5 years of age in Nanning district, Guangxi province. <i>Zhonghua Liu Xing Bing xue za zhi= Zhonghua Liuxingbingxue Zazhi</i> 2004; <b>25</b> (5): 391-5.                                                           |
| 11. Chen Y, Liu L, Luo Y. Clinical analysis of 200 cases of purulent meningitis. <i>Chin J Med</i> 1999; <b>34</b> (7): 37 (in Chinese).                                                                                                                                                                                            |
| 12. Feng H, Wang F, Zhang Y. Mortality rate and causes of deaths among children under 5 years old in Guizhou province, 1991–1995. <i>Chin J Public Health</i> 2017; <b>33</b> (10): 1469–73 (in Chinese).                                                                                                                           |
| 13. He Z, Li X, Jiang L. Clinical analysis on 430 cases of infantile purulent meningitis. <i>SpringerPlus</i> 2016; <b>5</b> (1): 1994.                                                                                                                                                                                             |
| 14. Le Y, Wang F, Gao W. Early diagnosis and treatment of purulent meningitis in infants: with analysis of 57 cases. <i>Journal of Liaoning Medical University</i> 1988; <b>9</b> (2): 140–2 (in Chinese).                                                                                                                          |
| 15. Lv Z, Duan Q, Liu X, Yue S. Analysis of prognostic factors in 79 cases of pediatric purulent meningitis. <i>Shandong Medical Journal</i> 2001; <b>40</b> (20): 49–50 (in Chinese).                                                                                                                                              |
| 16. Zhang L. The study of clinical and pathogenic analysis and the value of S100B in early diagnosis of pediatric bacterial meningitis [Master's Thesis]: Fudan University; 2013 (in Chinese).                                                                                                                                      |
| 17. Zhang Y, Li M, Liu G, Song L, Zhang L, Xu A. Analysis of common pathogens and epidemiological characteristics of acute bacterial meningitis cases in Shandong Province. Paper presented at: The 9th forum on basic science & applied technology for prevention and control of infectious diseases. Inner Mongolia, China; 2018. |
| 18. Zhang Y, Li M, Song L, et al. Sentinel surveillance and etiological analysis of acute bacterial meningitis in Shandong, 2006–2012. <i>Dis Surveill</i> 2014; <b>29</b> (1): 48–50 (in Chinese).                                                                                                                                 |
| 19. Zhao X, Cao W. Mortality surveillance of children younger than five years in Gansu, China in 2001–2005. <i>Maternal and child health care of China</i> 2011; <b>26</b> : 4354-6 (in Chinese).                                                                                                                                   |
| 20. Zou D, Liao J, Hu Y, Li B. Clinical analysis of 55 cases of purulent meningitis in infants. <i>The Journal of Practical Medicine</i> 2011; <b>27</b> (4): 639–42 (in Chinese).                                                                                                                                                  |

---

| <b>Studies reporting on epidemiology of pneumococcal meningitis</b>                                                    |
|------------------------------------------------------------------------------------------------------------------------|
| 1. Lin M, Dong BQ, Tang Z, et al. Epidemiological features of bacterial meningitis among children under 5 years old in |

---

- 
- Nanning. *South China J Prevent Med* 2004; **30**(6): 30–3 (in Chinese).
2. Wu X, Dong BQ, Lin M, et al. Analysis of epidemiologic features of children with suspected meningitis in Nanning, Guangxi, 2000–2002. *Guangxi Prev Med* 2004; **10**(6): 324–6 (in Chinese).
  3. Mo X, Gai Tobe R, Liu X, Mori R. Cost-effectiveness and Health Benefits of Pediatric 23-valent Pneumococcal Polysaccharide Vaccine, 7-valent Pneumococcal Conjugate Vaccine and Forecasting 13-valent Pneumococcal Conjugate Vaccine in China. *The Pediatric infectious disease journal* 2016; **35**(11): e353–e61.
  4. Shi X, Ma X, Bai C. Clinical analysis of 120 cases of pneumococcal meningitis in children. *Chin J Infect Chemother* 2021; **21**(5): 523–9 (in Chinese).
  5. Zhu L, Guo X, Wang X, et al. Single center clinical study on clinical characteristics and drug susceptibility of pneumococcal meningitis in children. *Clin J Appl Clin Pediatr* 2020; **35**(7): 550–4 (in Chinese).
  6. Wang C, Xu H, Deng J-k, et al. A multicentric clinical study on clinical characteristics and drug sensitivity of children with pneumococcal meningitis in China. *Chin J Pediatr* 2019; **57**(5): 355–62 (in Chinese).
  7. Zhang Y, Li M, Liu G, Song L, Zhang L, Xu A. Analysis of common pathogens and epidemiological characteristics of acute bacterial meningitis cases in Shandong Province. Paper presented at: The 9th forum on basic science & applied technology for prevention and control of infectious diseases. Inner Mongolia, China; 2018.
  8. Zhang J. 88 cases of specific pathogens of infantile purulent meningitis clinical analysis [Master's Thesis]: Chongqing Medical University; 2017.
  9. Wang W, Han H, Du L, Li Z, Wu Y. Clinical Features and Outcomes of Streptococcus pneumoniae Meningitis in Children: A Retrospective Analysis of 26 Cases in China. *Neuropediatrics* 2022; **53**(01).
- 

#### **Studies providing information about etiology**

---

1. Chen H. Statistical analysis of pathogenic bacteria and antibiotic sensitivity in children with purulent meningitis. *Chin J Pract Nerv Dis* 2014; **17**(22): 61–2 (in Chinese).
  2. Chen L, Deng M, Xiao T, Wu D. Clinical and etiological analysis of bacterial meningitis in children aged 0–3 years. *J Youjiang Med Univ Natl* 2021; **43**(5): 648–51 (in Chinese).
  3. Du L, Han H, Shi K, et al. Distribution of pathogenic bacteria and changes in drug resistance in children with bacterial meningitis in Taiyuan. *J Clin Med Lit* 2014; **1**(11).
  4. Gao J, Yi Z, Zhong J. The etiology and antibiotic resistance patterns of childhood purulent meningitis: a report of 164 cases. *J Pediatr Pharm* 2013; **19**(6): 35–8 (in Chinese).
  5. Guo LY, Zhang ZX, Wang X, et al. Clinical and pathogenic analysis of 507 children with bacterial meningitis in Beijing 2010–2014. *International journal of infectious diseases : IJID : official publication of the International Society for Infectious Diseases* 2016; **50**: 38–43.
  6. He ZH, Li XJ, Jiang L. Clinical analysis on 430 cases of infantile purulent meningitis. *SpringerPlus* 2016; **5**: 6.
  7. Huang J, Liu X, Tong H. Analysis of etiology and clinical characteristics of 70 cases of purulent meningitis in children of Zhongshan area. *Chin Youjiang Med J* 2020; **48**(9): 680–5 (in Chinese).
  8. Huang Q, Liu L, Tie T. Detection of Streptococcus pneumoniae meningitis and epidemiological analysis in the Xining area from 2013 to 2017. *J Pathog Biol* 2019; **14**(3): 342–4 (in Chinese)
  9. Huang S. Clinical analysis of 108 cases purulent meningitis in infants [Master's Thesis]: Guangxi Medical University; 2013 (in Chinese).
  10. Huang T, Liu X, Chen Z, SUN Y. Distribution and drug resistance of pathogenic bacteria from children with purulent meningitis in Tianjin Children's Hospital from 2014 to 2018. *Drugs Clin* 2019; **34**(6): 1909–14 (in Chinese).
  11. Li C, Feng WY, Lin AW, et al. Clinical characteristics and etiology of bacterial meningitis in Chinese children >28 days of age, January 2014–December 2016: A multicenter retrospective study. *International journal of infectious diseases : IJID : official publication of the International Society for Infectious Diseases* 2018; **74**: 47–53.
  12. Li H, Zhang Y, Zhang J, et al. Ten-year changes in pathogen, antimicrobial susceptibility and clinical feature of children
-

- 
- with bacterial meningitis. *Chin J Pediatr* 2009; **47**(4): 272–5 (in Chinese).
13. Li X, Wang Q, Wang J, Wang X, Zhao A, Gui H. Distribution and drug resistance analysis of cerebrospinal fluid pathogens in infants with purulent meningitis aged 0–3 months. *Chin J Pract Nerv Dis* 2020; **23**(6): 534–9 (in Chinese).
  14. Lin L, Lin L, Wen S, Chen X, Shang Y, Li C. Pathogenic bacteria distribution and drug resistance in one hundred children of bacterial meningitis. *J Clin Pediatr* 2016; **34**(2): 105–10 (in Chinese).
  15. Liu L, Qiu M. Clinical analysis of 72 cases of bacterial meningitis in infants under 6 months old. *Clin Med China* 2018; **34**(3): 277–80 (in Chinese).
  16. LU D, Ouyang L. A discussion of the etiology associated with pediatric purulent meningitis. *Anhui Med J* 1992; **13**(1): 18–9 (in Chinese).
  17. Mi R, Xu F, Li L, Qin Y, Li T. Clinical analysis of 73 cases of neonatal and infantile purulent meningitis. *J Appl Clin Pediatr* 2007; **22**(10): 751–2 (in Chinese).
  18. Mu L, Kuang L, Zhou W, SU M, Jiang Y. Distribution of pathogenic bacteria and drug resistance analysis of bacterial meningitis in children in Chengdu. *Maternal and child health care of China* 2015; **30**: 5175–7 (in Chinese).
  19. Peng Q, Wu Z, Liu D, Tao S. The distribution of pathogens and prognosis in ninety-five children with etiology confirmed bacterial meningitis. *J Clin Pediatr* 2016; **34**(6): 425–9 (in Chinese).
  20. Shi L, Liu W, Zhang H. Analysis of the distribution of clinical pathogenic microorganisms and drug resistance in 86 cases of children with bacterial meningitis. *Proc Clin Med* 2018; **27**(3): 204–6.
  21. Tan D, Dong B, Li C. Etiological Study on the bacterial meningitis in children under 5 years of age in Nanning City, Guangxi. *China Trop Med* 2004; **4**(3): 333–6 (in Chinese).
  22. Tan J, Kan J, Qiu G, et al. Clinical Prognosis in Neonatal Bacterial Meningitis: The Role of Cerebrospinal Fluid Protein. *PLoS One* 2015; **10**(10): e0141620.
  23. Wang H, Duan L, Sun Y. Analysis of clinical characteristics and distribution of pathogenic bacteria and drug resistance in children under 3 years of age with purulent meningitis. *Maternal and child health care of China* 2018; **33**(18): 4180–3 (in Chinese).
  24. Wu C, Chai S, He W. Analysis of pathogen distribution and susceptibility testing of patients with purulent meningitis. *Chin J Nosocomiol* 2015; **25**(13): 2926–8 (in Chinese).
  25. Wu J. Clinical characteristics and related refractory factors of childhood bacterial meningitis with positive etiology [Master's Thesis]: Chongqing Medical University; 2020.
  26. Wu L, Han W, Wang G, Jiang L, Yin F. Pathogenic and diagnostic analysis of bacterial meningitis children in Midwest area. *Chin J Appl Clin Pediatr* 2018; **33**(10): 778–82 (in Chinese).
  27. Xie Y, Deng Q, Guo Y, Huang Y, Zhong Y. Investigation of pathogen in children with bacterial meningitis. *J Clin Pediatr* 2011; **29**(11): 1037–40 (in Chinese).
  28. Yang J, Liao W, Deng H. Pathogenic Bacteria Distribution and Drug Resistance of Children with Purulent Meningitis. *Pract J Card Cereb Pneum Vasc Dis* 2015; **23**(12): 36–8 (in Chinese).
  29. Ye J. Clinical analysis of 72 cases of purulent meningitis in infants and children. *Zhejiang J Integ Tradit Chin West Med* 2011; **21**(5): 353–4 (in Chinese).
  30. Yu J, Wu C, Zhao H. Clinical characteristics and predictors of purulent meningitis in infants. *Guanzhou Med J* 2018; **49**(5): 61–6 (in Chinese).
  31. Zheng J, Lin C. Analysis on pathogenic bacteria and drug sensitivity of children diagnosed with purulent meningitis in Quanzhou area. *Chin Foreign Med Res* 2020; **18**(36): 170–2 (in Chinese).
  32. Zou D, Liao J, Hu Y, Li B. Clinical analysis of 55 cases of purulent meningitis in infants. *J Pract Med* 2011; **27**(4): 639–42 (in Chinese).
-

**Table S3. Profile of included studies on incidence rate of meningitis**

| Meningitis type                | Author-Year               | Province | Study Design  | Meningitis cases | Denominator (child-years) | Incidence rate (/100,000) |
|--------------------------------|---------------------------|----------|---------------|------------------|---------------------------|---------------------------|
| Probable bacterial meningitis  | Yixing Li et al. 2014     | Shandong | Surveillance  | 345              | 4102260                   | 8.41                      |
| Probable bacterial meningitis  | Yixing Li et al. 2014     | Hubei    | Surveillance  | 89               | 1280575                   | 6.95                      |
| Probable bacterial meningitis  | Yixing Li et al. 2014     | Hebei    | Surveillance  | 294              | 2563208                   | 11.47                     |
| Probable bacterial meningitis  | Yixing Li et al. 2014     | Guangxi  | Surveillance  | 436              | 1951656                   | 22.34                     |
| Confirmed bacterial meningitis | Xinghua Wu et al. 2004    | Guangxi  | Surveillance  | 38               | 306947                    | 12.38                     |
| Confirmed bacterial meningitis | Jinye Yang 2010           | Guangxi  | Surveillance  | 14               | 583333                    | 2.40                      |
| Confirmed bacterial meningitis | Yonghong Yang et al. 1996 | Anhui    | Observational | 46               | 234454                    | 19.62                     |
| Pneumococcal meningitis        | Mei Lin et al. 2004       | Guangxi  | Surveillance  | 4                | 307692                    | 1.30                      |
| Pneumococcal meningitis        | Xinghua Wu et al. 2004    | Guangxi  | Surveillance  | 3                | 306947                    | 0.98                      |
| Pneumococcal meningitis        | Kaile Chen et al. 2021    | Jiangsu  | Surveillance  | 33               | 722100                    | 4.57                      |

**Table S4. Profile of included studies on mortality rate of meningitis**

| Meningitis type                | Author-Year              | Province | Start Year | End Year | Deaths | Denominator (child-years) | Mortality rate (/100,000) (95%CI) |
|--------------------------------|--------------------------|----------|------------|----------|--------|---------------------------|-----------------------------------|
| All-cause meningitis           | Xiaoxia Zhao et al. 2011 | Gansu    | 2001       | 2005     | 7      | 74137                     | 9.44                              |
| All-cause meningitis           | Haizhe Feng et al. 2017  | Guizhou  | 2004       | 2008     | 18     | 201715                    | 8.92                              |
| All-cause meningitis           | Haizhe Feng et al. 2017  | Guizhou  | 2009       | 2009     | 108    | 358341                    | 30.14                             |
| All-cause meningitis           | Haizhe Feng et al. 2017  | Guizhou  | 2010       | 2010     | 122    | 448996                    | 27.17                             |
| All-cause meningitis           | Haizhe Feng et al. 2017  | Guizhou  | 2011       | 2011     | 104    | 444643                    | 23.39                             |
| All-cause meningitis           | Haizhe Feng et al. 2017  | Guizhou  | 2012       | 2012     | 115    | 332185                    | 34.62                             |
| All-cause meningitis           | Haizhe Feng et al. 2017  | Guizhou  | 2013       | 2013     | 17     | 220769                    | 7.70                              |
| All-cause meningitis           | Haizhe Feng et al. 2017  | Guizhou  | 2014       | 2014     | 172    | 414359                    | 41.51                             |
| All-cause meningitis           | Haizhe Feng et al. 2017  | Guizhou  | 2015       | 2015     | 14     | 304672                    | 4.60                              |
| Confirmed bacterial meningitis | Xinghua Wu et al. 2004   | Guangxi  | 2000       | 2002     | 7      | 306947                    | 2.28                              |
| Pneumococcal meningitis        | Mei Lin et al. 2004      | Guangxi  | 2000       | 2002     | 1      | 307692                    | 0.33                              |

**Table S5. Profile of included studies on case-fatality rate of meningitis**

| Author-Year                | Start year | End year | Province     | Data source    | Study Design  | Age strata | Meningitis Type | Case number | Death number |
|----------------------------|------------|----------|--------------|----------------|---------------|------------|-----------------|-------------|--------------|
| Xiaoling Shi et al. 2021   | 2017       | 2019     | Qinghai      | Hospital-based | Retrospective | 0~1y       | PM              | 80          | 19           |
| Liang Zhu et al. 2020      | 2012       | 2017     | Beijing      | Hospital-based | Retrospective | 0~1y       | PM              | 32          | 11           |
| Liang Zhu et al. 2020      | 2012       | 2017     | Beijing      | Hospital-based | Retrospective | 3~5y       | PM              | 30          | 8            |
| Caiyun Wang et al. 2019    | 2013       | 2017     | Multi-center | Hospital-based | Retrospective | 0~1y       | PM              | 64          | 16           |
| Caiyun Wang et al. 2019    | 2013       | 2017     | Multi-center | Hospital-based | Retrospective | 1~3y       | PM              | 39          | 7            |
| Yan Zhang et al. 2018      | 2013       | 2016     | Shandong     | Hospital-based | Retrospective | 1~3y       | PM              | 4           | 0            |
| Wenhui Wang et al. 2022    | 2014       | 2016     | Shanxi       | Hospital-based | Retrospective | 3~5y       | PM              | 26          | 11           |
| Mei et al. 2004            | 2000       | 2002     | Guangxi      | Surveillance   | Prospective   | 3~5y       | PM              | 4           | 1            |
| Shiqin Huang et al. 2013   | 2005       | 2012     | Guangxi      | Hospital-based | Retrospective | 1~3y       | BM              | 108         | 0            |
| Lili Zhang et al. 2008     | 1986       | 2005     | Jiangsu      | Hospital-based | Retrospective | 1~3y       | BM              | 178         | 44           |
| Ruirong Li et al. 2010     | 2010       | 2010     | Jiangxi      | Hospital-based | Retrospective | 0~1y       | BM              | 60          | 3            |
| Liang Huo et al. 2018      | 2010       | 2016     | Liaoning     | Hospital-based | Retrospective | 0~1y       | BM              | 238         | 1            |
| Mengyuan Huang et al. 2016 | 2006       | 2015     | Chongqing    | Hospital-based | Retrospective | 0~1y       | BM              | 203         | 0            |
| Baiqing Dong et al. 2004   | 2000       | 2002     | Guangxi      | Surveillance   | Prospective   | 3~5y       | BM              | 38          | 7            |
| Yan Zhang et al. 2018      | 2013       | 2016     | Shandong     | Hospital-based | Retrospective | 1~3y       | BM              | 194         | 0            |
| Li Zhang et al. 2015       | 2001       | 2012     | Shanghai     | Hospital-based | Retrospective | 0~1y       | BM              | 36          | 1            |
| Li Zhang et al. 2015       | 2001       | 2012     | Shanghai     | Hospital-based | Retrospective | 1~3y       | BM              | 20          | 1            |



|                             |      |      |           |                    |               |      |    |     |    |
|-----------------------------|------|------|-----------|--------------------|---------------|------|----|-----|----|
| Zufang Lv et al.<br>2001    | 1990 | 2000 | Shandong  | Hospital-<br>based | Retrospective | 0~1y | BM | 65  | 8  |
| Dongfang Zou et al.<br>2011 | 2006 | 2010 | Guangdong | Hospital-<br>based | Retrospective | 0~1y | BM | 55  | 4  |
| Yanhua Chen et al.<br>1999  | 1993 | 1998 | Beijing   | Hospital-<br>based | Retrospective | 3~5y | BM | 200 | 5  |
| Yan Zhang et al.<br>2014    | 2006 | 2016 | Shandong  | Hospital-<br>based | Retrospective | 1~3y | BM | 63  | 0  |
| Yuan Le et al. 1988         | 1981 | 1987 | Liaoning  | Hospital-<br>based | Retrospective | 0~1y | BM | 57  | 10 |
| Zhihui He et al.<br>2016    | 2004 | 2013 | Chongqing | Hospital-<br>based | Retrospective | 1~3y | BM | 430 | 3  |

---

**Table S6. Profile of included studies on etiology bacterial meningitis**

| Author-Year              | Start year | End year | Province  | Data source    | Study Design  | Age strata      | Meningitis types | Specimen type | Method      | Total positive cases | Denominator | Sp positive |
|--------------------------|------------|----------|-----------|----------------|---------------|-----------------|------------------|---------------|-------------|----------------------|-------------|-------------|
| Qian Huang et al. 2019   | 2013       | 2017     | Qinghai   | Hospital-based | Retrospective | <5 years        | SBM              | CSF/Blood     | Culture/PCR | 24                   | 145         | 12          |
| Dongmei Tan et al. 2004  | 2000       | 2002     | Guangxi   | Surveillance   | Prospective   | <5 years        | SBM              | CSF           | Culture     | 22                   | 1212        | 3           |
| Dongmei Tan et al. 2004  | 2000       | 2002     | Guangxi   | Surveillance   | Prospective   | <5 years        | SBM              | Blood         | Culture     | 39                   | 1193        | 3           |
| Junjie Zheng et al. 2020 | 2016       | 2020     | Fujian    | Hospital-based | Prospective   | <5 years        | SBM              | CSF           | Culture     | 53                   | 5564        | 14          |
| Huiping Wang et al. 2018 | 2013       | 2017     | Yunnan    | Hospital-based | Retrospective | <3 years        | PBM              | CSF/Blood     | Culture     | 25                   | 1026        | 10          |
| Luohui Liu et al. 2018   | 2014       | 2016     | Guangdong | Hospital-based | Retrospective | <1 year         | PBM              | CSF/Blood     | Culture     | 6                    | 72          | -           |
| Shiqin Huang et al. 2013 | 2005       | 2012     | Guangxi   | Hospital-based | Retrospective | <3 years        | PBM              | Blood         | Culture     | 8                    | 68          | 1           |
| Shiqin Huang et al. 2013 | 2005       | 2012     | Guangxi   | Hospital-based | Retrospective | <3 years        | PBM              | CSF           | Culture     | 11                   | 97          | 3           |
| Jun Yang et al. 2015     | 2010       | 2014     | Guangdong | Hospital-based | Retrospective | 1 month~5 years | PBM              | CSF/Blood     | Culture     | 56                   | 64          |             |
| Dalin Lu et al. 1992     | 1986       | 1989     | Anhui     | Hospital-based | Retrospective | 1 month~1 year  | PBM              | CSF           | Culture     | 23                   | 71          | 6           |
| Dalin Lu et al. 1992     | 1986       | 1989     | Anhui     | Hospital-based | Retrospective | 1~3 years       | PBM              | CSF           | Culture     | 2                    | 11          | -           |

|                          |      |      |                   |                |               |                 |     |           |         |     |     |    |
|--------------------------|------|------|-------------------|----------------|---------------|-----------------|-----|-----------|---------|-----|-----|----|
| Rong Mi et al. 2007      | 1992 | 2006 | Beijing           | Hospital-based | Retrospective | < 3 months      | PBM | Blood     | Culture | 6   | 33  | -  |
| Dongfang Zou et al. 2011 | 2006 | 2010 | Guangdong         | Hospital-based | Retrospective | <1 year         | PBM | CSF       | Culture | 14  | 55  | 8  |
| Dongfang Zou et al. 2011 | 2006 | 2010 | Guangdong         | Hospital-based | Retrospective | <1 year         | PBM | Blood     | Culture | 22  | 55  | 6  |
| Jianre Ye et al. 2011    | 2008 | 2010 | Zhejiang          | Hospital-based | Retrospective | <3 years        | PBM | CSF/Blood | Culture | 27  | 72  | 4  |
| Jing Gao et al. 2013     | 2009 | 2011 | Jiangxi           | Hospital-based | Retrospective | <5 years        | PBM | CSF/Blood | Culture | 19  | 86  | 6  |
| Jieming Yu et al. 2018   | 2015 | 2017 | Fujian            | Hospital-based | Retrospective | 1~3 months      | PBM | Blood     | Culture | 10  | 53  | -  |
| Jieming Yu et al. 2018   | 2015 | 2017 | Fujian            | Hospital-based | Retrospective | 1~3 months      | PBM | CSF       | Culture | 4   | 53  | -  |
| Liwen Wu et al. 2018     | 2011 | 2016 | Hunan & Chongqing | Hospital-based | Retrospective | 1 month~1 year  | PBM | CSF/Blood | Culture | 109 | 317 | 13 |
| Liwen Wu et al. 2018     | 2011 | 2016 | Hunan & Chongqing | Hospital-based | Retrospective | 1~3 years       | PBM | CSF/Blood | Culture | 16  | 47  | 11 |
| Zhihui He et al. 2016    | 2004 | 2013 | Chongqing         | Hospital-based | Retrospective | 1 month~3 years | PBM | Blood     | Culture | 22  | 146 | 5  |
| Zhihui He et al. 2016    | 2004 | 2013 | Chongqing         | Hospital-based | Retrospective | 1 month~3 years | PBM | CSF       | Culture | 5   | 420 | 2  |
| Chi Li et al. 2018       | 2014 | 2016 | Multi-center      | Hospital-based | Retrospective | 1 month~3 years | PBM | CSF/Blood | Culture | 224 | 576 | 96 |
| Xueqin Li et al. 2020    | 2015 | 2019 | Henan             | Hospital-based | Retrospective | <3 months       | CBM | CSF       | Culture | 63  | -   | -  |

|                            |      |      |           |                |               |                 |     |           |         |    |   |    |
|----------------------------|------|------|-----------|----------------|---------------|-----------------|-----|-----------|---------|----|---|----|
| Liping Chen et al. 2021    | 2014 | 2019 | Fujian    | Hospital-based | Retrospective | 1 month~3 years | CBM | CSF       | Culture | 28 | - | 13 |
| Lei Shi et al. 2018        | 2012 | 2016 | Henan     | Hospital-based | Retrospective | 1 month~1 year  | CBM | CSF       | Culture | 26 | - | 3  |
| Lei Shi et al. 2018        | 2012 | 2016 | Henan     | Hospital-based | Retrospective | 1~3 years       | CBM | CSF       | Culture | 19 | - | -  |
| Tao Huang et al. 2019      | 2014 | 2018 | Tianjin   | Hospital-based | Retrospective | 1 month~1 year  | CBM | CSF/Blood | Culture | 50 | - | 10 |
| Tao Huang et al. 2019      | 2014 | 2018 | Tianjin   | Hospital-based | Retrospective | 1~5 years       | CBM | CSF/Blood | Culture | 16 | - | 5  |
| Liyuan Wu et al. 2015      | 2009 | 2014 | Sichuan   | Hospital-based | Retrospective | 3 months~1 year | CBM | CSF       | Culture | 12 | - | 4  |
| Liyuan Wu et al. 2015      | 2009 | 2014 | Sichuan   | Hospital-based | Retrospective | 1~3 years       | CBM | CSF       | Culture | 5  | - | 5  |
| Qiongling Peng et al. 2016 | 2011 | 2015 | Guangdong | Hospital-based | Retrospective | <1 year         | CBM | CSF/Blood | Culture | 43 | - | 17 |
| Qiongling Peng et al. 2016 | 2011 | 2015 | Guangdong | Hospital-based | Retrospective | <3 years        | CBM | CSF/Blood | Culture | 18 | - | 10 |
| Luona lin et al. 2016      | 2004 | 2015 | Zhejiang  | Hospital-based | Retrospective | <1 year         | CBM | CSF/Blood | Culture | 42 | - | 15 |
| Yongqiang Xie et al. 2011  | 2005 | 2009 | Guangdong | Hospital-based | Retrospective | 1~3 months      | CBM | CSF       | Culture | 55 | - | 5  |
| Yongqiang Xie et al. 2011  | 2005 | 2009 | Guangdong | Hospital-based | Retrospective | 3 months~1 year | CBM | CSF       | Culture | 76 | - | 20 |
| Yongqiang Xie et al. 2011  | 2005 | 2009 | Guangdong | Hospital-based | Retrospective | 1~3 years       | CBM | CSF       | Culture | 76 | - | 26 |

|                         |      |      |           |                |               |                 |     |           |         |     |   |    |
|-------------------------|------|------|-----------|----------------|---------------|-----------------|-----|-----------|---------|-----|---|----|
| Hong Li et al. 2009     | 1998 | 2002 | Tianjin   | Hospital-based | Retrospective | 1 month~5 years | CBM | CSF       | Culture | 63  | - | 4  |
| Chunfang Wu et al. 2015 | 2012 | 2014 | Henan     | Hospital-based | Retrospective | 1 month~5 years | CBM | CSF/Blood | Culture | 45  | - | 3  |
| Lijun Du et al. 2014    | 2005 | 2014 | Shanxi    | Hospital-based | Retrospective | <3 months       | CBM | CSF       | Culture | 94  | - | 2  |
| Lijun Du et al. 2014    | 1994 | 2004 | Shanxi    | Hospital-based | Retrospective | <3 months       | CBM | CSF       | Culture | 32  | - | 3  |
| Lijun Du et al. 2014    | 1994 | 2004 | Shanxi    | Hospital-based | Retrospective | 3 months~1 year | CBM | CSF       | Culture | 70  | - | 15 |
| Lijun Du et al. 2014    | 2005 | 2014 | Shanxi    | Hospital-based | Retrospective | 3 months~1 year | CBM | CSF       | Culture | 65  | - | 21 |
| Lijun Du et al. 2014    | 2005 | 2014 | Shanxi    | Hospital-based | Retrospective | 1~5 years       | CBM | CSF       | Culture | 96  | - | 29 |
| Lijun Du et al. 2014    | 1994 | 2014 | Shanxi    | Hospital-based | Retrospective | 1~5 years       | CBM | CSF       | Culture | 72  | - | 22 |
| Jun Huang 2020          | 2014 | 2020 | Guangdong | Hospital-based | Retrospective | 1 month~1 year  | CBM | CSF       | Culture | 30  | - | 3  |
| Lingyun Guo 2016        | 2010 | 2014 | Beijing   | Hospital-based | Retrospective | 1~2 months      | CBM | CSF/Blood | Culture | 43  | - | 1  |
| Lingyun Guo 2016        | 2010 | 2014 | Beijing   | Hospital-based | Retrospective | 3 months~1 year | CBM | CSF/Blood | Culture | 115 | - | 58 |
| Lingyun Guo 2016        | 2010 | 2014 | Beijing   | Hospital-based | Retrospective | 1~3 years       | CBM | CSF/Blood | Culture | 66  | - | 37 |
| Lingyun Guo 2016        | 2010 | 2014 | Beijing   | Hospital-based | Retrospective | 3~5 years       | CBM | CSF/Blood | Culture | 37  | - | 22 |

|                    |      |      |              |                |               |                 |     |           |         |     |   |    |
|--------------------|------|------|--------------|----------------|---------------|-----------------|-----|-----------|---------|-----|---|----|
| Jinfeng Wu 2020    | 2012 | 2018 | Chongqing    | Hospital-based | Retrospective | 1~3 months      | CBM | CSF/Blood | Culture | 40  | - | 1  |
| Hongshi Chen 2014  | 2011 | 2013 | Hainan       | Hospital-based | Retrospective | 1 month~1 year  | CBM | CSF       | Culture | 57  | - | 7  |
| Hongshi Chen 2014  | 2011 | 2013 | Hainan       | Hospital-based | Retrospective | 1~5 years       | CBM | CSF       | Culture | 8   | - | 4  |
| Xiaoshan Peng 2021 | 2016 | 2018 | Multi-center | Hospital-based | Retrospective | 3 months~1 year | CBM | CSF       | Culture | 253 | - | 53 |

---

**Table S7. Antimicrobial profile of *Streptococcus pneumoniae***

| Antibiotics      | Studies no. | Resistant isolates | Total specimens | Pooled resistant rate % (95%CI) |
|------------------|-------------|--------------------|-----------------|---------------------------------|
| Ampicillin       | 1           | 10                 | 10              | 100.00 (69.15-100.00)           |
| Clindamycin      | 4           | 77                 | 85              | 99.47 (68.55-100.00)            |
| Tetracycline     | 4           | 79                 | 72              | 96.28 (71.98-100.00)            |
| Erythromycin     | 5           | 66                 | 75              | 77.65 (44.75-99.14)             |
| Penicillin       | 7           | 70                 | 104             | 71.50 (43.78-93.36)             |
| Sulfamethoxazole | 4           | 54                 | 62              | 71.13 (57.84-83.08)             |
| Meropenem        | 2           | 15                 | 23              | 65.18 (16.57-99.78)             |
| Cefoxitin        | 1           | 12                 | 19              | 63.16 (38.36-83.71)             |
| Ciprofloxacin    | 2           | 16                 | 29              | 50.51 (7.24-93.35)              |
| Oxacillin        | 3           | 19                 | 28              | 42.24 (3.83-86.33)              |
| Cefepime         | 4           | 16                 | 32              | 33.47 (2.88-73.05)              |
| Cefotaxime       | 4           | 25                 | 76              | 29.56 (4.03-63.88)              |
| Ceftazidime      | 3           | 8                  | 19              | 23.04 (0.00-70.28)              |
| Chloramphenicol  | 4           | 7                  | 76              | 6.71 (1.39-14.45)               |
| Amoxicillin      | 2           | 3                  | 53              | 4.41 (0.06-12.63)               |
| Rifampicin       | 3           | 2                  | 43              | 1.61 (0.00-9.53)                |
| Levofloxacin     | 4           | 1                  | 76              | 0.04 (0.00-3.49)                |
| Moxifloxacin     | 2           | 0                  | 27              | 0.00 (0.00-7.09)                |
| Linezolid        | 3           | 0                  | 37              | 0.00 (0.00-5.52)                |
| Vancomycin       | 7           | 0                  | 104             | 0.00 (0.00-0.95)                |
| Clavulanic acid  | 1           | 0                  | 10              | 0.00 (0.00-30.85)               |
| Ceftriaxone      | 1           | 0                  | 10              | 0.00 (0.00-30.85)               |
| Imipenem         | 1           | 0                  | 10              | 0.00 (0.00-30.85)               |
| Teicoplanin      | 1           | 0                  | 10              | 0.00 (0.00-30.85)               |
| Gentamicin       | 1           | 0                  | 10              | 0.00 (0.00-30.85)               |
| Dalfopristin     | 1           | 0                  | 14              | 0.00 (0.00-23.16)               |
| Telithromycin    | 1           | 0                  | 14              | 0.00 (0.00-23.16)               |

**Table S8. Serotype distribution of detected *Streptococcus pneumoniae* in bacterial meningitis**

|                           | Coverage (%)        |                      |                       |
|---------------------------|---------------------|----------------------|-----------------------|
|                           | PCV7                | PCV13                | PPSV23                |
| Xiaoyan Shi et al. 2018   | 74.36               | 91.67                | 100.00                |
| Kaile Chen et al. 2021    | 84.00               | 96.00                | 100.00                |
| Pooled coverage % (95%CI) | 78.95 (69.03-88.87) | 91.10 (80.05-100.00) | 100.00 (97.12-100.00) |

**Table S9. Sensitive analysis of estimated pneumococcal meningitis burden using different proxies for access to care**

| Parameter                            | Model Used in the Present Study | Alternative Model <sup>a</sup> |
|--------------------------------------|---------------------------------|--------------------------------|
|                                      | Source of Data                  | Source of Data                 |
| Incidence Rate (/100,000)<br>(95%CI) | 2.10 (0.59-7.46)                | 2.10 (0.59-7.46)               |
| Population of Under-fives            | 77,883,888                      | 77,883,888                     |
| CFR % (95%CI)                        | 24.59 (19.35-30.28)             | 24.59 (19.35-30.28)            |
| PCV Coverage (%)                     | 1.68%                           | 1.68%                          |
| Adjusted CFR % (95%CI)               | 33.94 (29.36-38.81)             | 50.54 (47.32-53.97)            |
| Proxy for access to care<br>(%)      | 85.71                           | 60.33                          |
| Estimated Cases                      | 1617.16 (454.35-5744.78)        | 1617.16 (454.35-5744.78)       |
| Estimated Deaths                     | 548.86 (474.80-627.62)          | 817.31 (765.24-872.78)         |

<sup>a</sup> In the present model, proxy for access to care was calculated using the item “Was medical care sought?” and that in the alternative model was calculated using the item “Saw local health workers or doctors”.





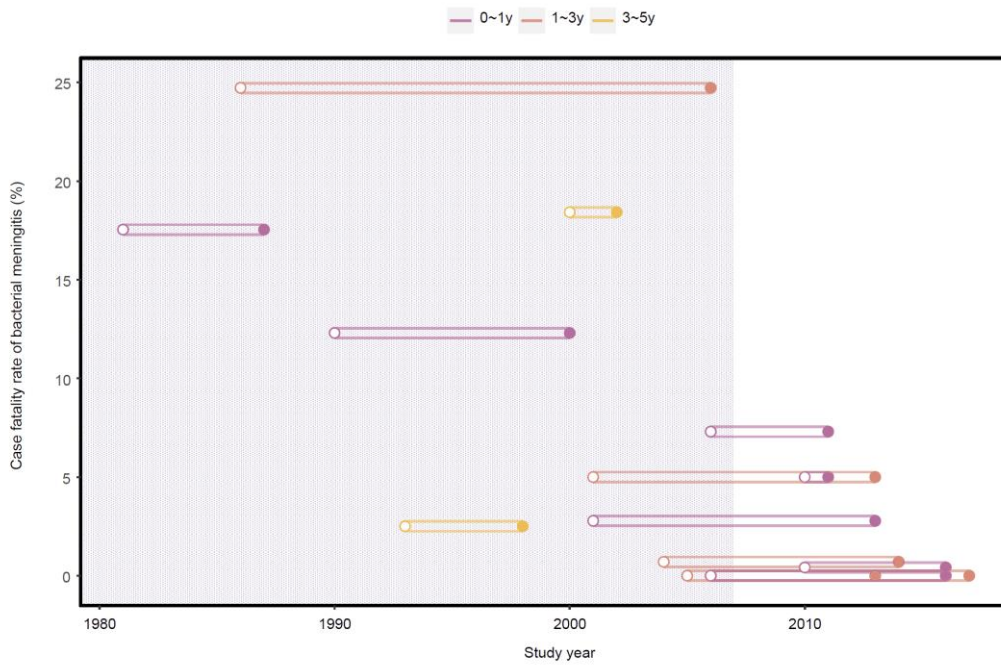

**Figure S3. Distribution of case fatality rate of bacterial meningitis by time and age.**  
 Hollow dots represent the start year of the study and solid dots represent the end year of the study. The dashed area represents time before year 2008.



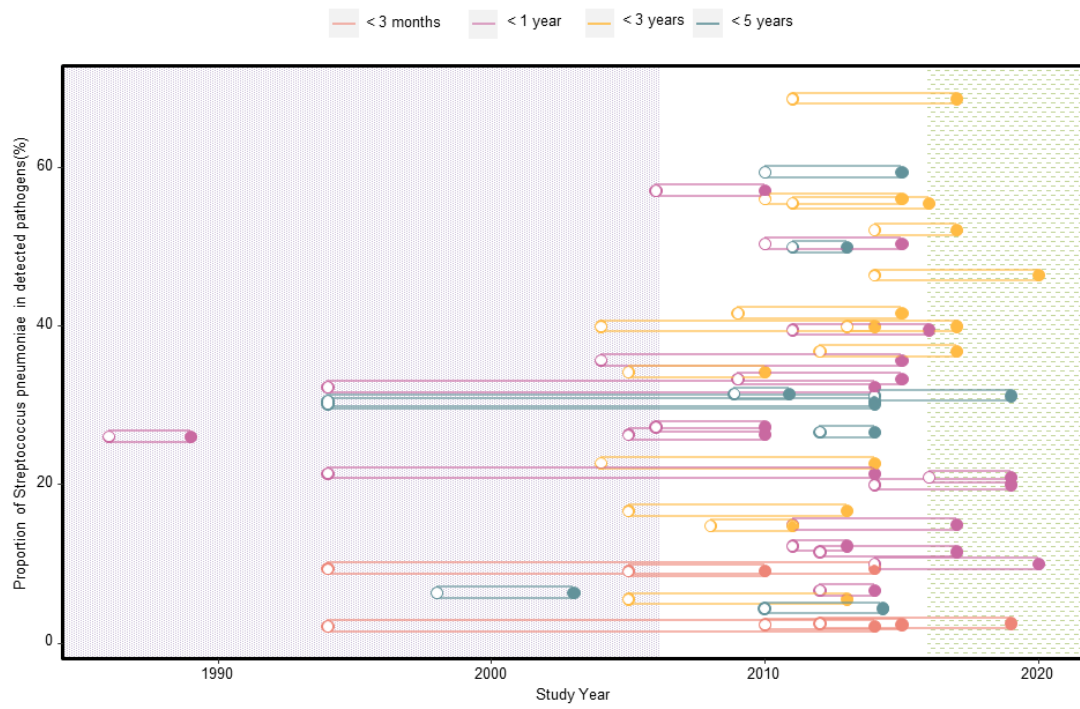

**Figure S5. Distribution of proportion of *Streptococcus pneumoniae* in detected pathogens by time and age.**

Hollow dots represent the start year of the study and solid dots represent the end year of the study. The dashed area represents time before year 2008.

### A Pooled Incidence rate of Pneumococcal Meningitis

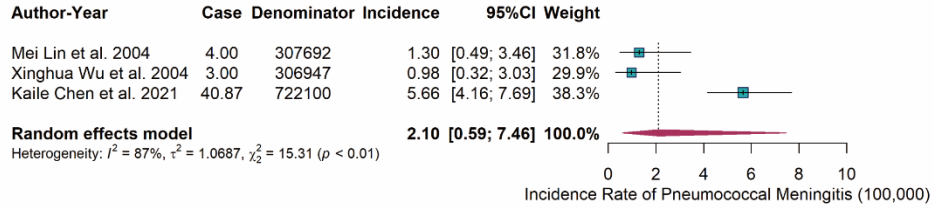

### B Pooled Incidence rate of Confirmed Bacterial Meningitis

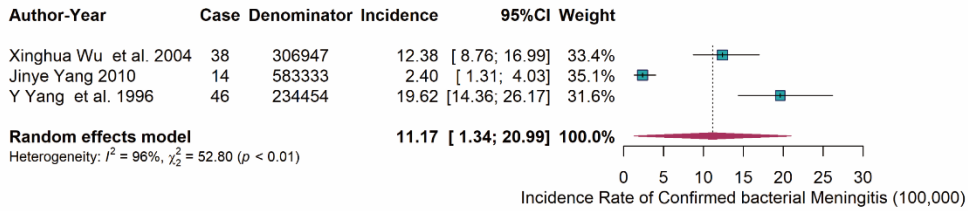

### C Pooled Incidence rate of Probable Bacterial Meningitis

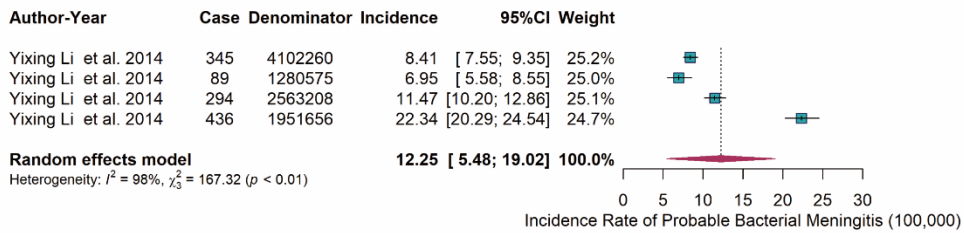

### D Mortality Rate of Meningitis

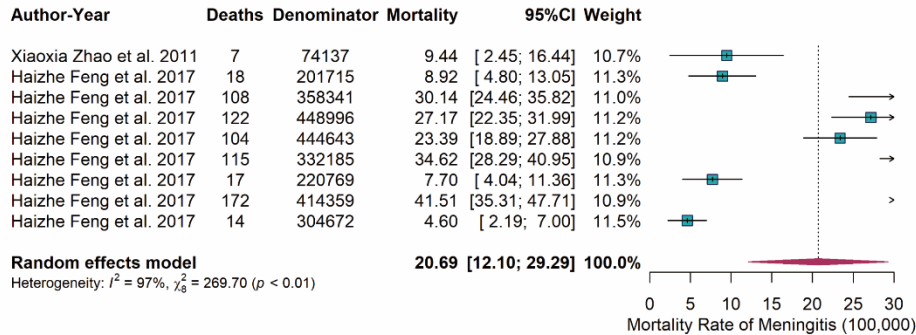

Figure S6. Forest plot of studies on incidence and mortality rate of meningitis.

### A Pooled Case Fatality Rate of Bacterial Meningitis

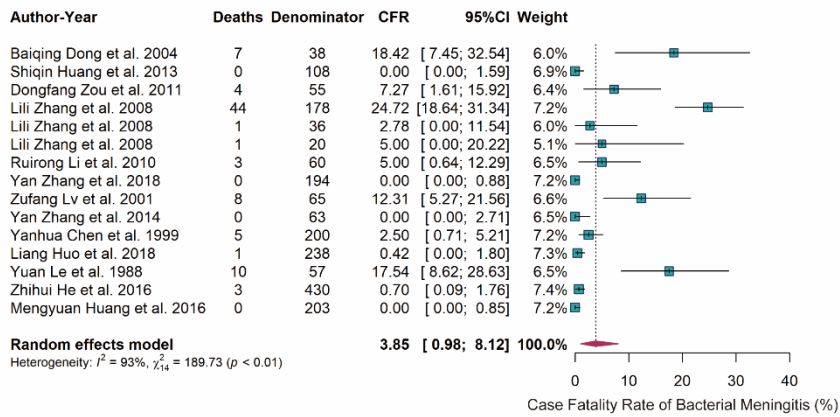

### B Pooled Case Fatality Rate of Pneumococcal Meningitis

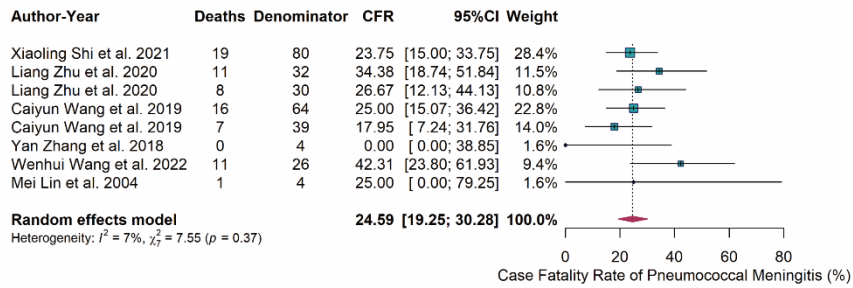

**Figure S7. Forest plot of studies on case-fatality rate of meningitis.**

### A Pooled Detection Rate of *Streptococcus pneumoniae* in Suspected Bacterial Meningitis

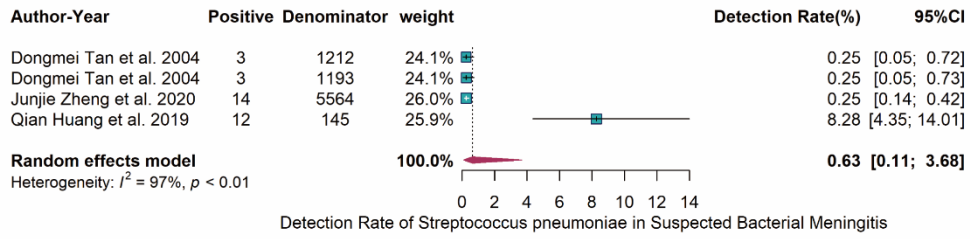

### B Pooled Proportion of Pneumococcal Meningitis in Suspected Bacterial Meningitis Cases

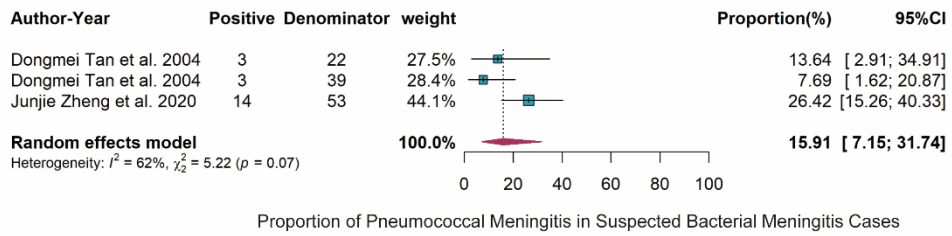

**Figure S8.** Forest plot of studies on positive rate and proportion of *Streptococcus pneumoniae* among suspected bacterial meningitis cases.

**A Pooled Detection Rate of Streptococcus pneumoniae in Probable Bacterial Meningitis**

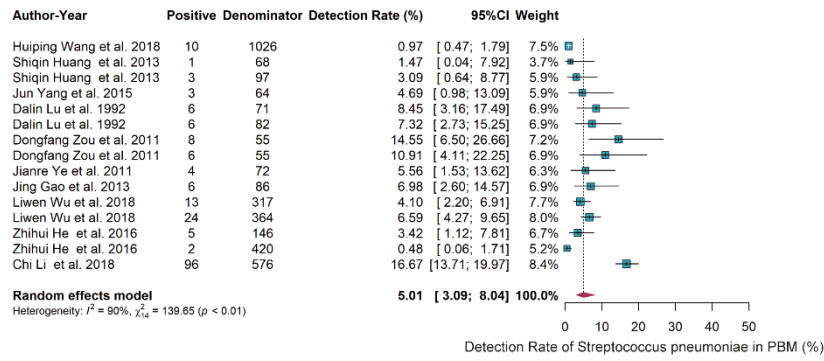

**B Pooled Proportion of Pneumococcal Meningitis in Confirmed Bacterial Meningitis Cases**

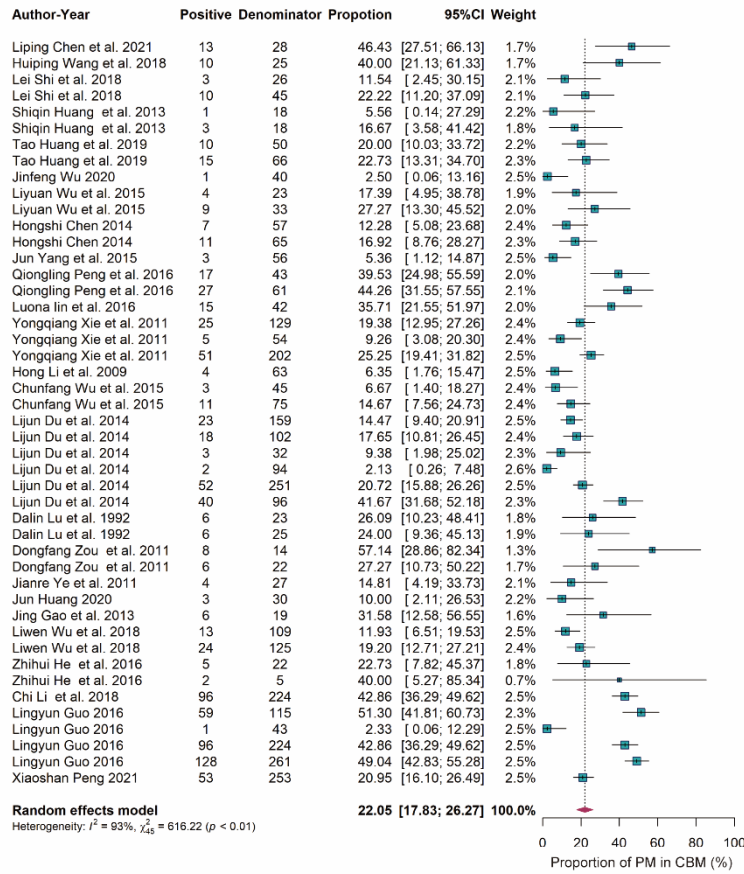

**Figure S9. Forest plot of studies on *Streptococcus pneumoniae* positive rate in probable meningitis bacterial cases and proportion of pneumococcal meningitis in confirmed bacterial meningitis cases.**
